# Supplementary material
Source: HighWire-hosted journal article supplement (doi:10.1101/rna.079699.123)
Supplement: Supplemental_Figure_Legends.docx [file Supplemental_Figure_Legends.docx]

**Supplementary Figure Legends**

**Figure S1: ASO ISH assay validation on fresh frozen dosed mouse liver using probes against Scrambled sequence (negative control), RNU6 (RNA, U6 small nuclear 1) universal positive control and bepirovirsen.** Positive staining is indicated by the presence of Fast red chromogen. Counterstained with Hematoxylin to demonstrate general nuclear morphology and tissue integrity. Specificity of the assay is demonstrated by the absence of any staining with the negative control probe, which also reveals excellent preservation of nuclear and cellular morphology under the pre-treatment regime used in these experiments on this tissue. General RNA integrity and preservation is confirmed by the ubiquitous nuclear expression of the positive control probe. Widespread and diffuse distribution of the ASO can be seen throughout the dosed liver, even at 4mg/kg, the lowest dose administered. Bar = 20 mm

**Figure S2: Spontaneous Raman imaging of control and treated (40 mg/kg) female mouse kidneys.** (A and B) Average Raman spectra obtained from control and treated mouse kidney sections at fingerprint and C-H regions, respectively. On panel B, the sum of scores of principal components, PC-2 and PC-3 on the C-H spectra is shown. (C and D) Raman images of control and high dose mouse kidney tissues at the C-H frequency of 2885 cm-1 treated with label free ASOs for 24 hours. (E and F) Ratio of the pixel intensities at the ring breathing vibrational frequency (1307 cm-1/1347 cm-1) for the control and high dose mouse kidney samples. (G and H) Sum of the scores of PC-2 and PC-3 for the control and high dosed mouse kidney samples, respectively.

**Figure S3: miRNAscope workflow ISH-IHC on FFPE samples using the Leica BOND RX automated staining platform.** The co-detection workflow has been optimized by the manufacturer to enable primary antibodies, diluted in the ACD Co-Detection Antibody Diluent, to bind specifically to their target antigens following the heated target retrieval step at pH 9 and subsequently post-fixed in 10% Neutral buffered Formalin prior to the protease digestion step essential for ISH pre-hybridization. Following probe hybridization, an amplification tree is sequentially built from the bound probes, and the ASO (or other miRNAscope probes) are detected with Alkaline Phosphatase and Fast Red, followed by a Horseradish Peroxidase catalyzed detection, offline, of the target proteins with the Leica Green HRP chromogen and nuclei counterstained with half-strength Gill’s I Hematoxylin.

**Figure S4: ISH-IHC co-detection of ASO and Calbindin in FFPE 12 mg/kg dosed kidney**. ASO distribution (red) primarily in proximal convoluted tubules (px) and parietal cells of the glomerular tuft within the Bowman’s capsule (*), with lower but still detectable distribution in Calbindin-positive distal convoluted tubules (di) in green. Bar = 20 mm
